# Supplementary material
Source: Springer Nature journal article supplement (https://www.springermedizin.de/resource/supplementary/12936_2013_2867_MOESM8_ESM.pdf/9544484)

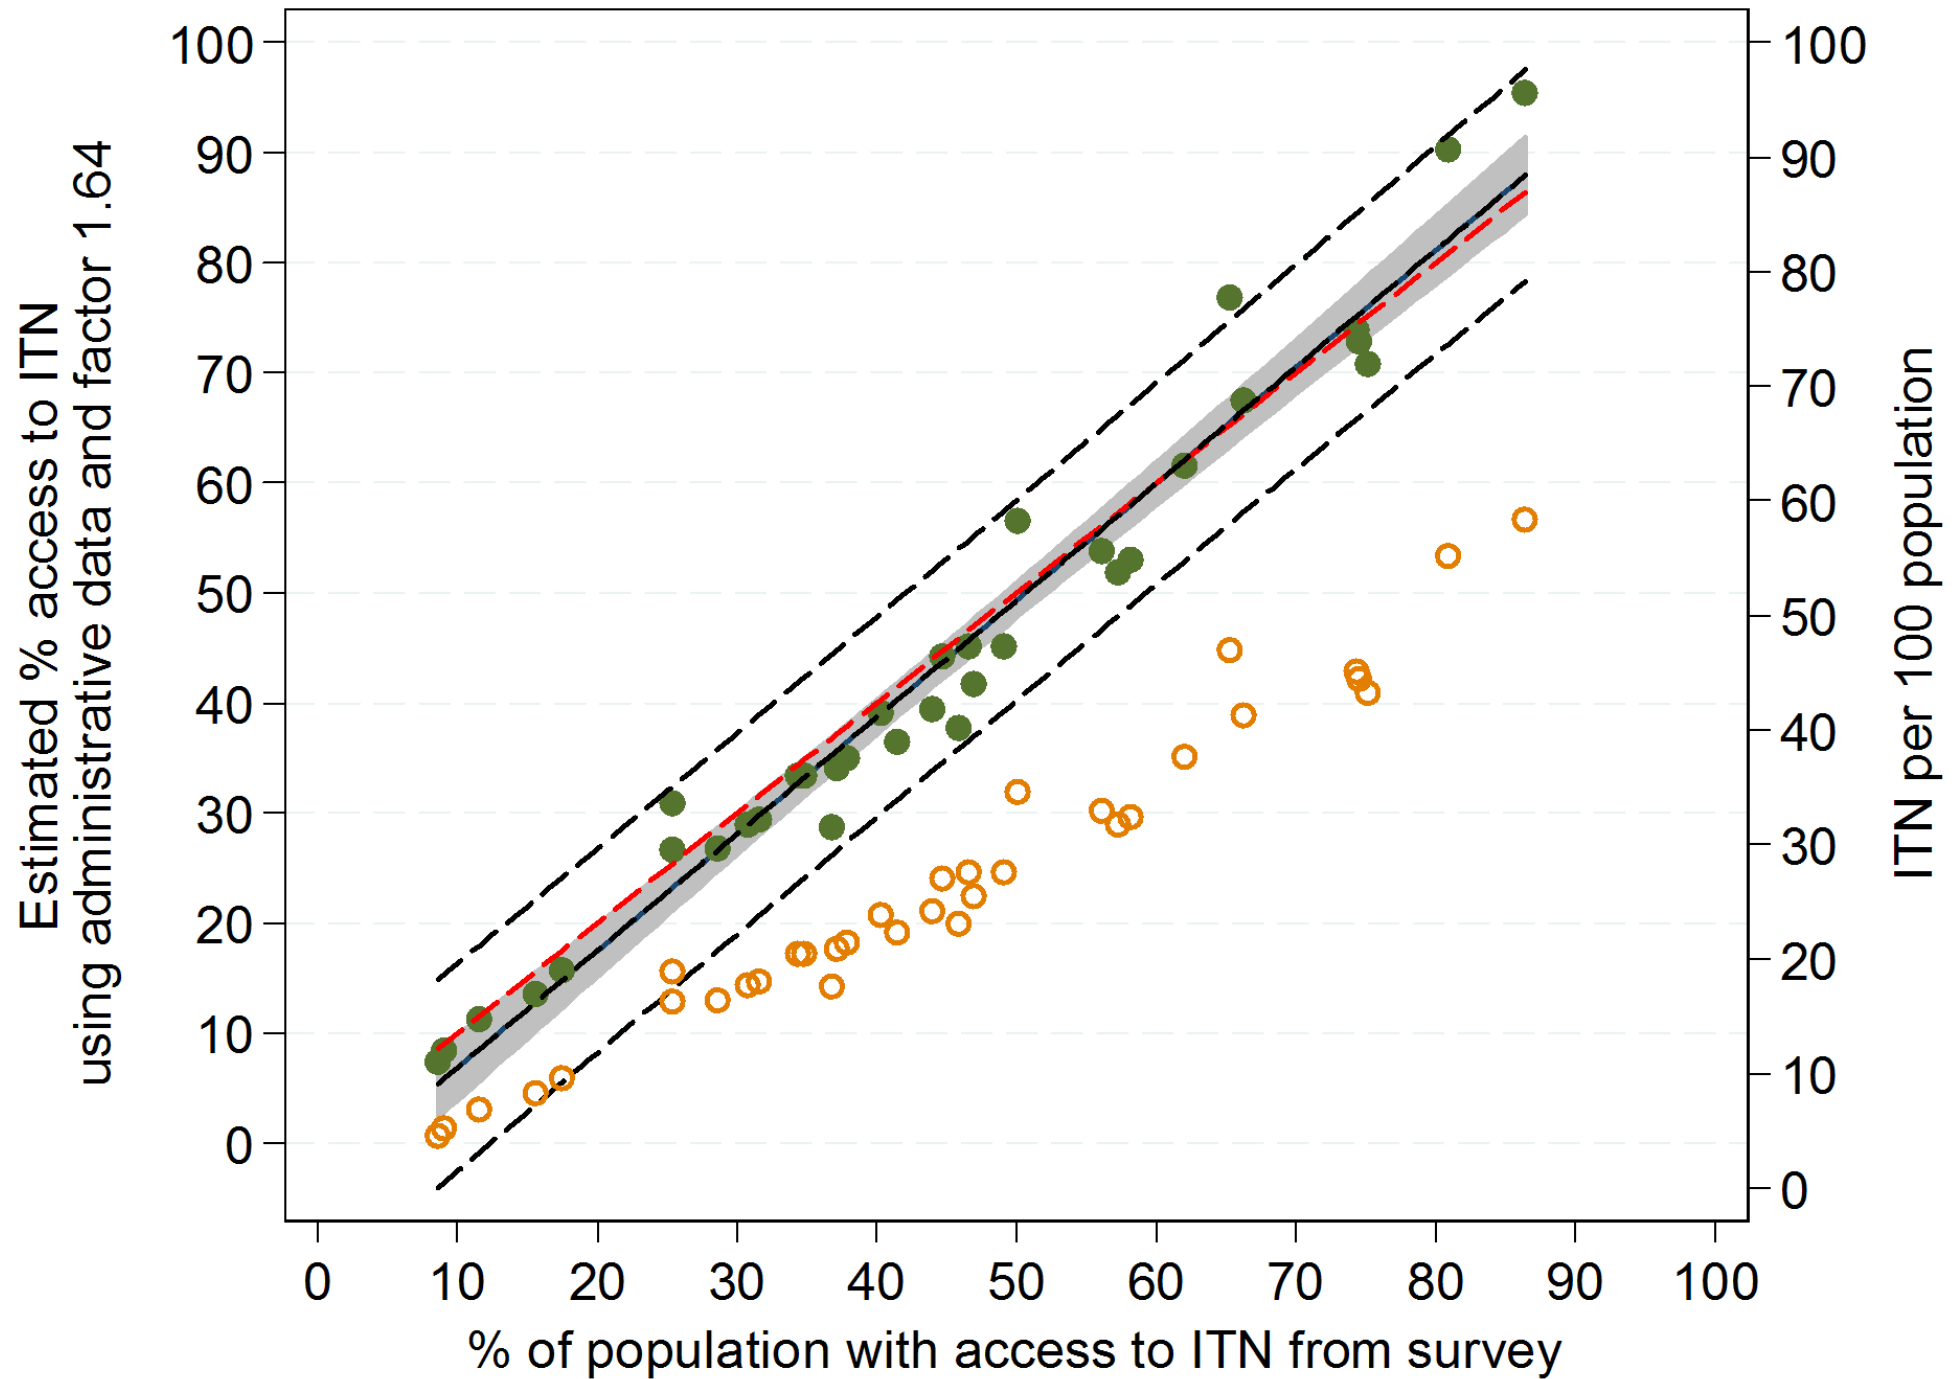

Supplement: MOESM8 [file 9544484]
